# Supplementary material
Source: PubMed Central journal article supplement (PMC5808808)

Physical Length:46.7kb

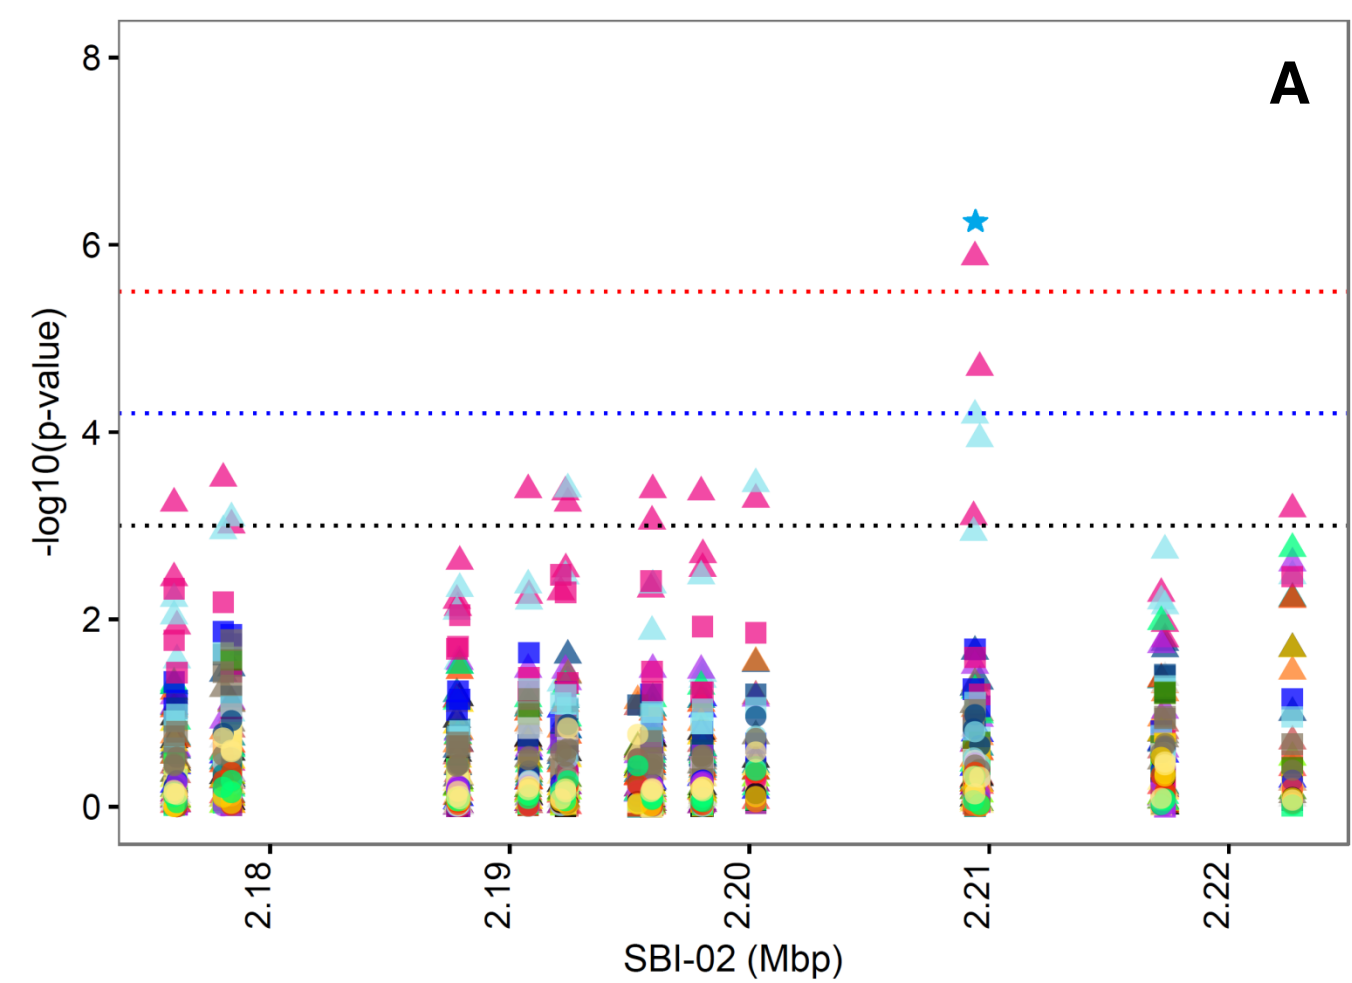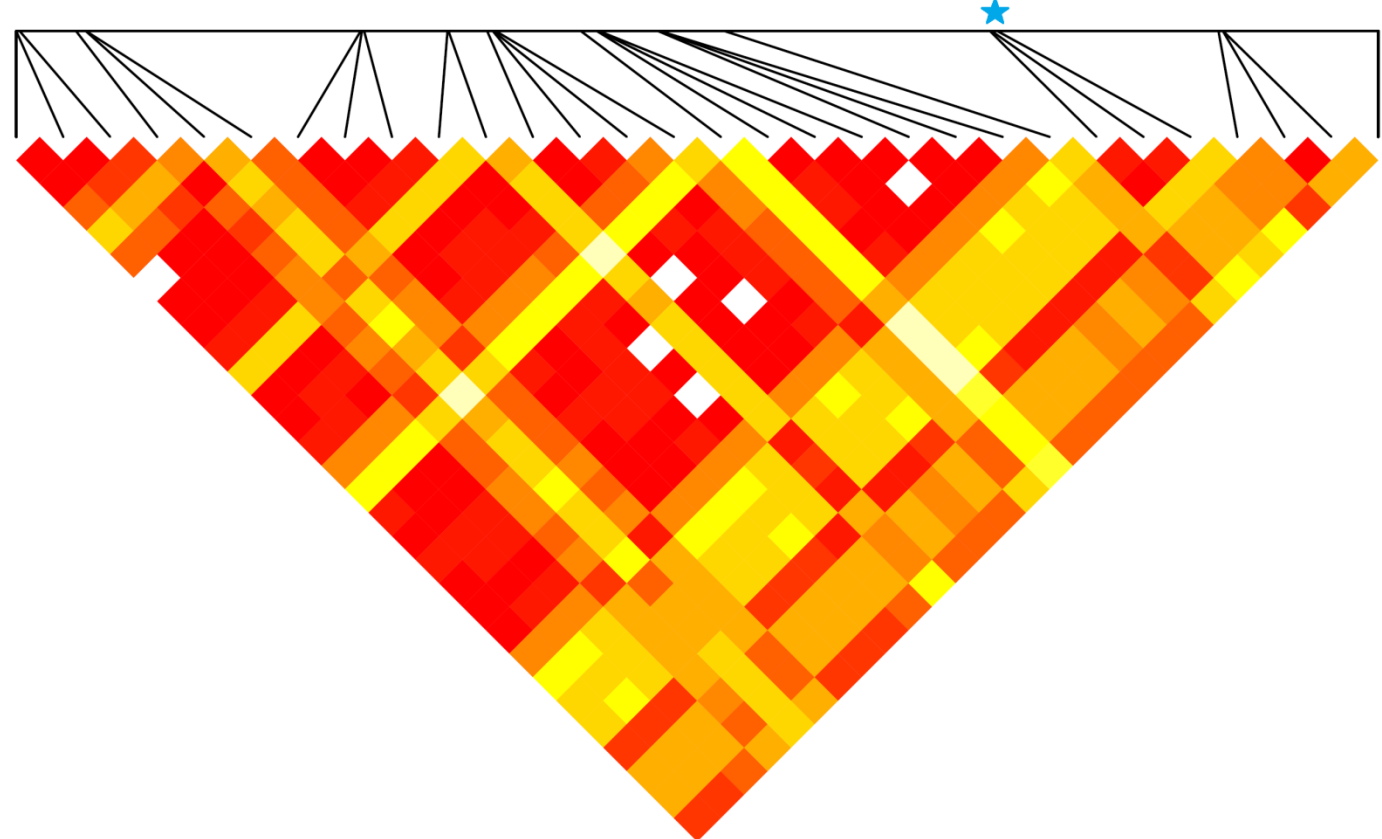

Physical Length:231.9kb

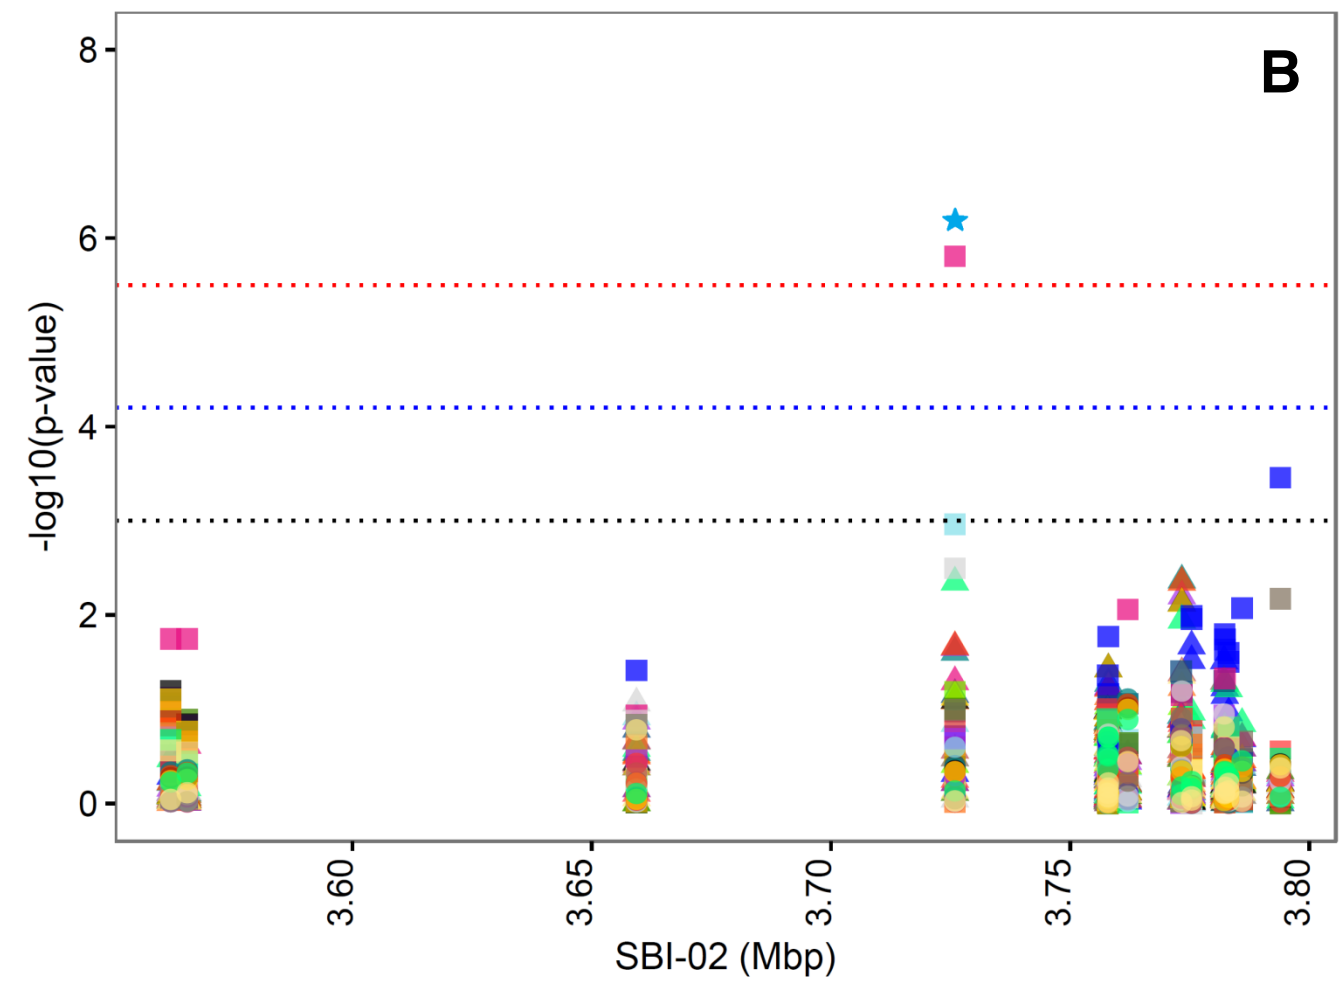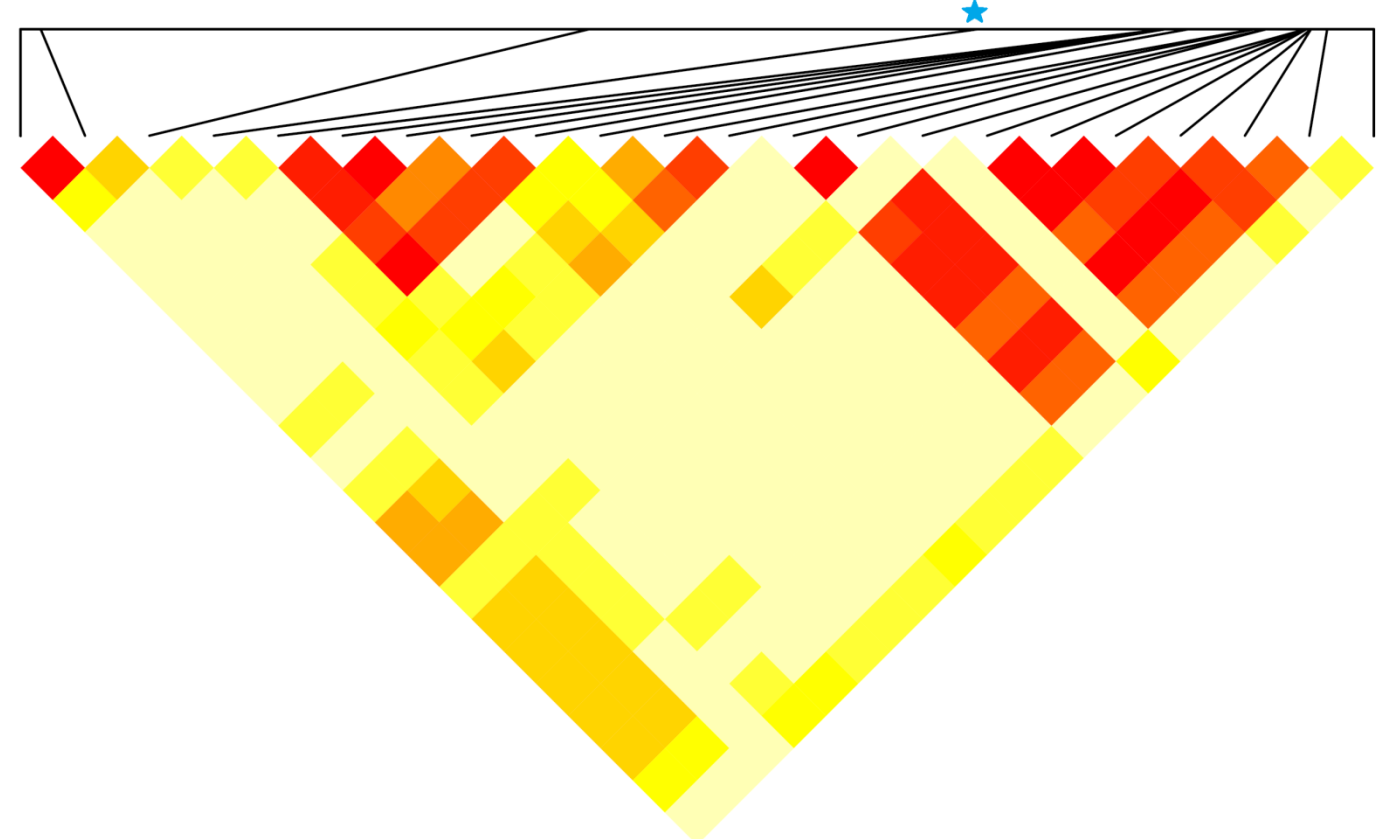

Physical Length:153.4kb

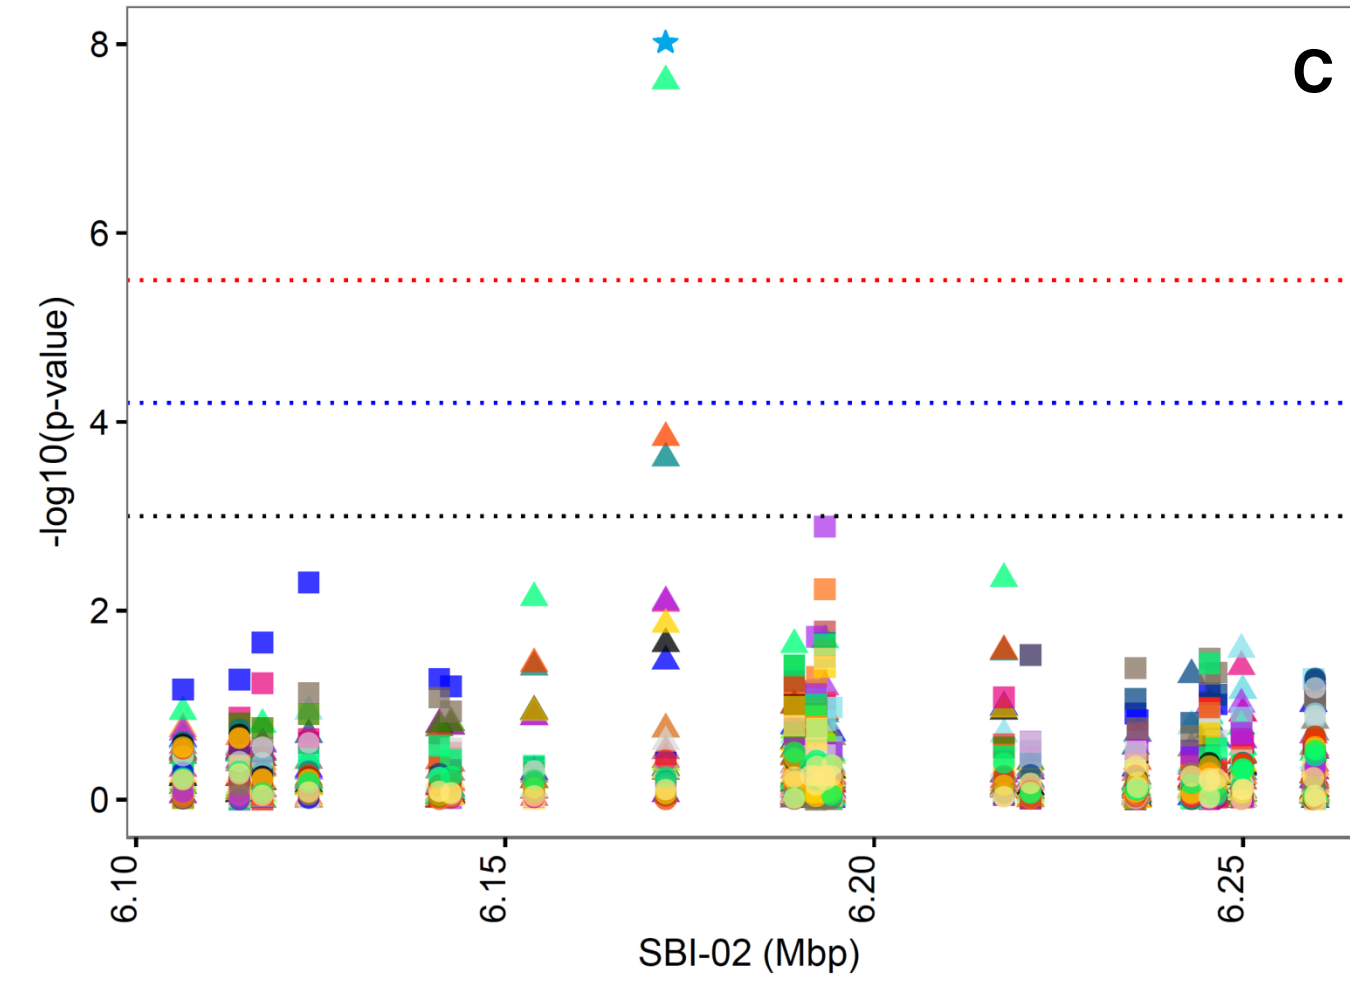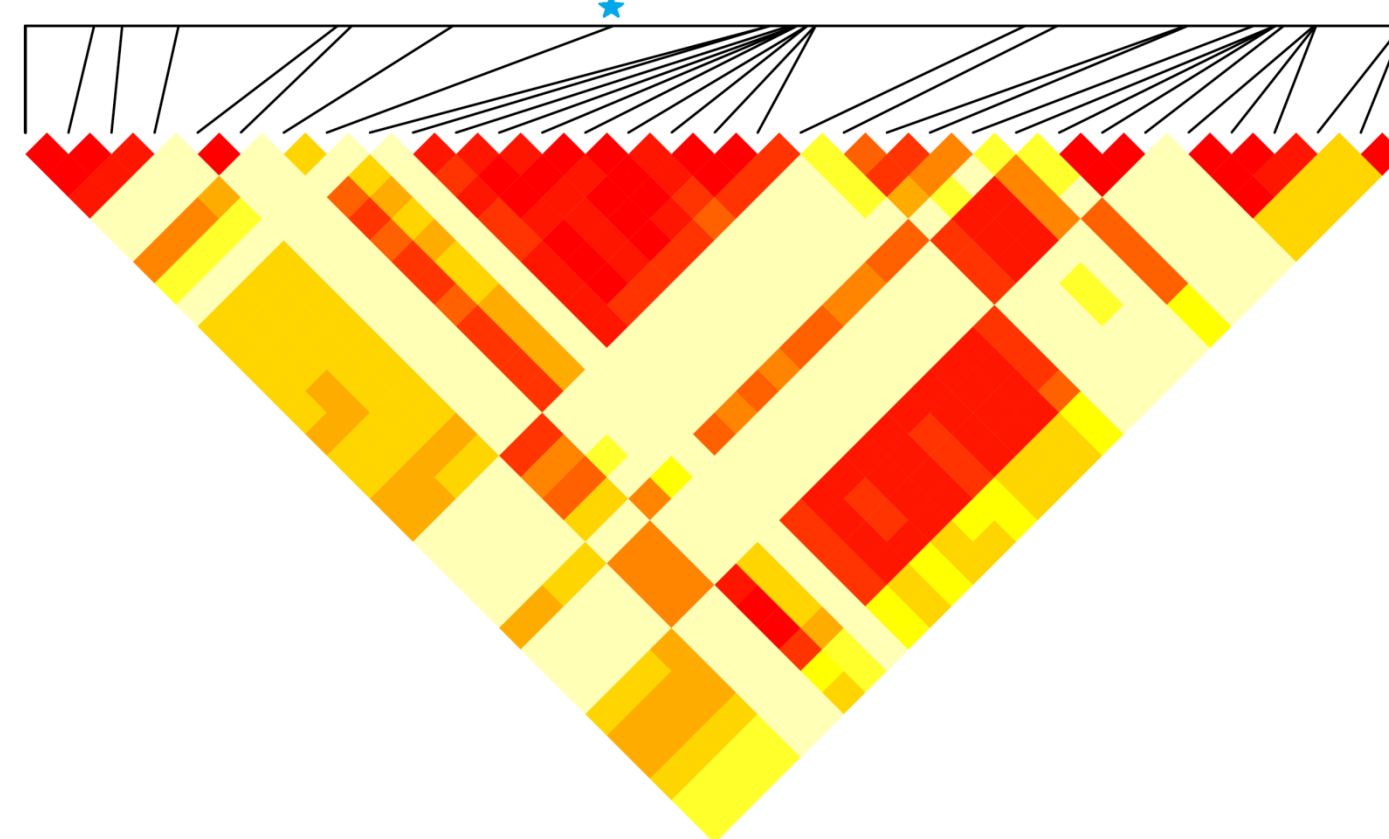

Physical Length:54.6kb

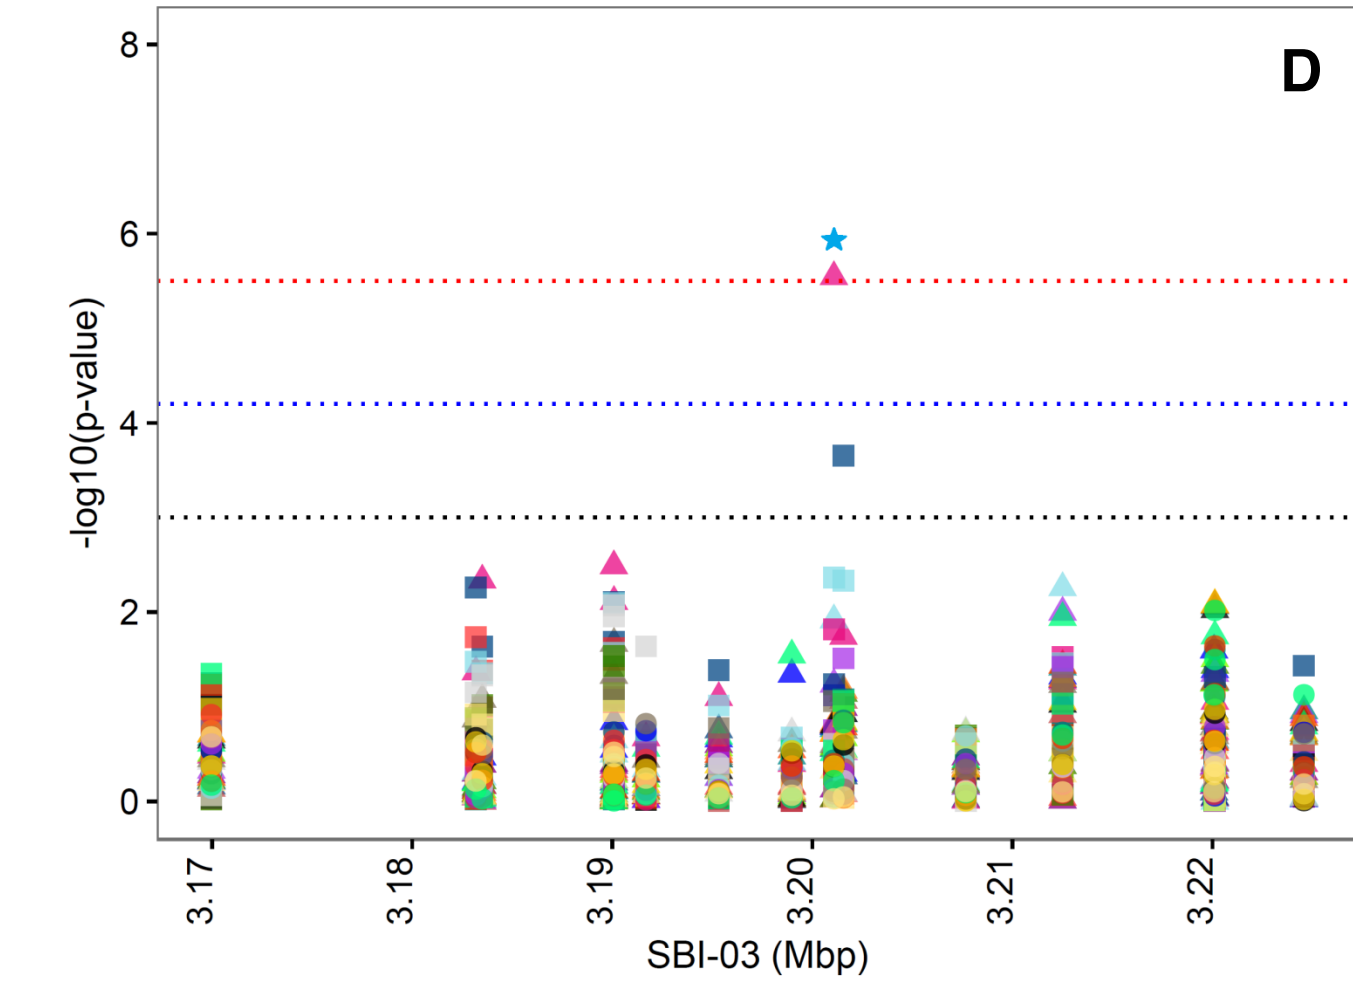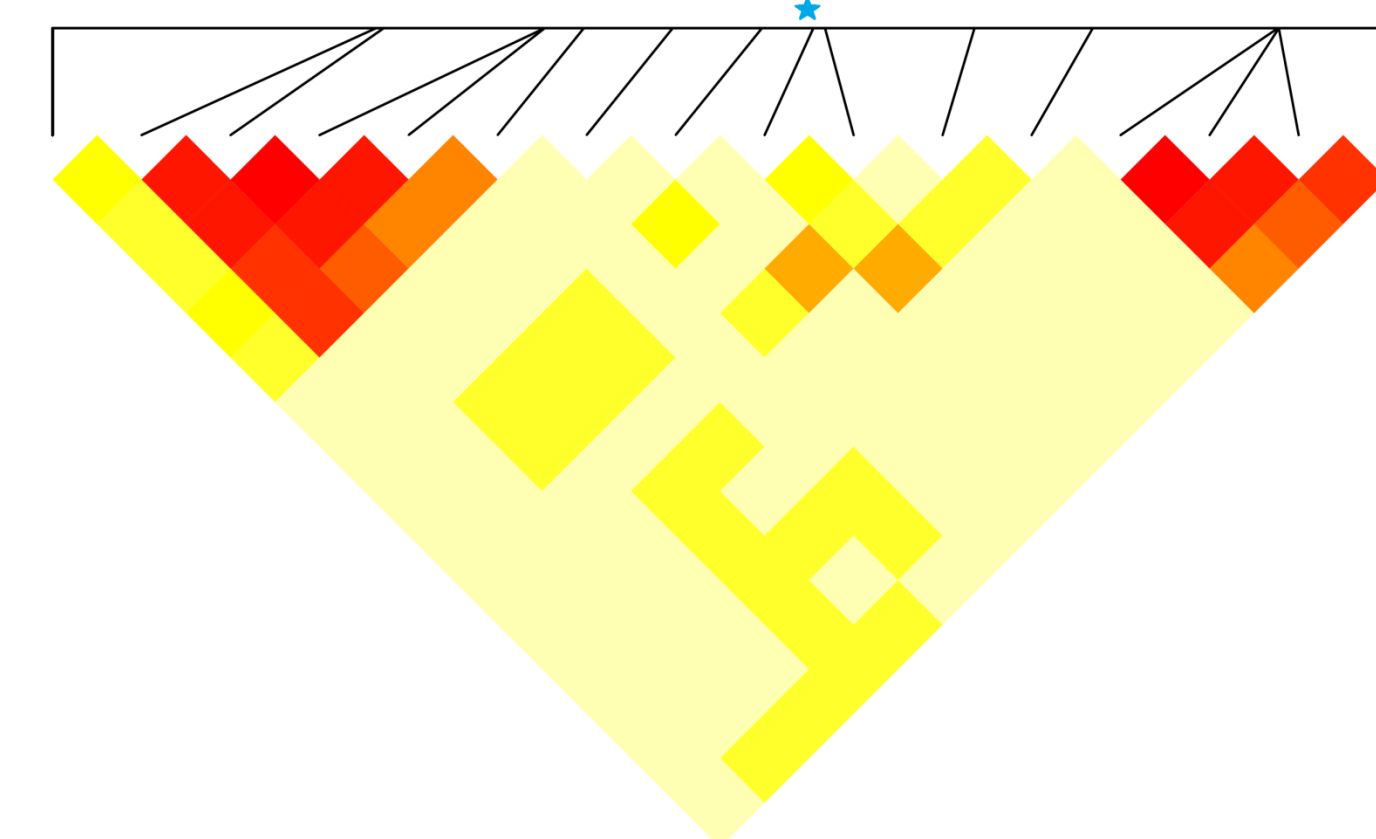

Physical Length:156.5kb

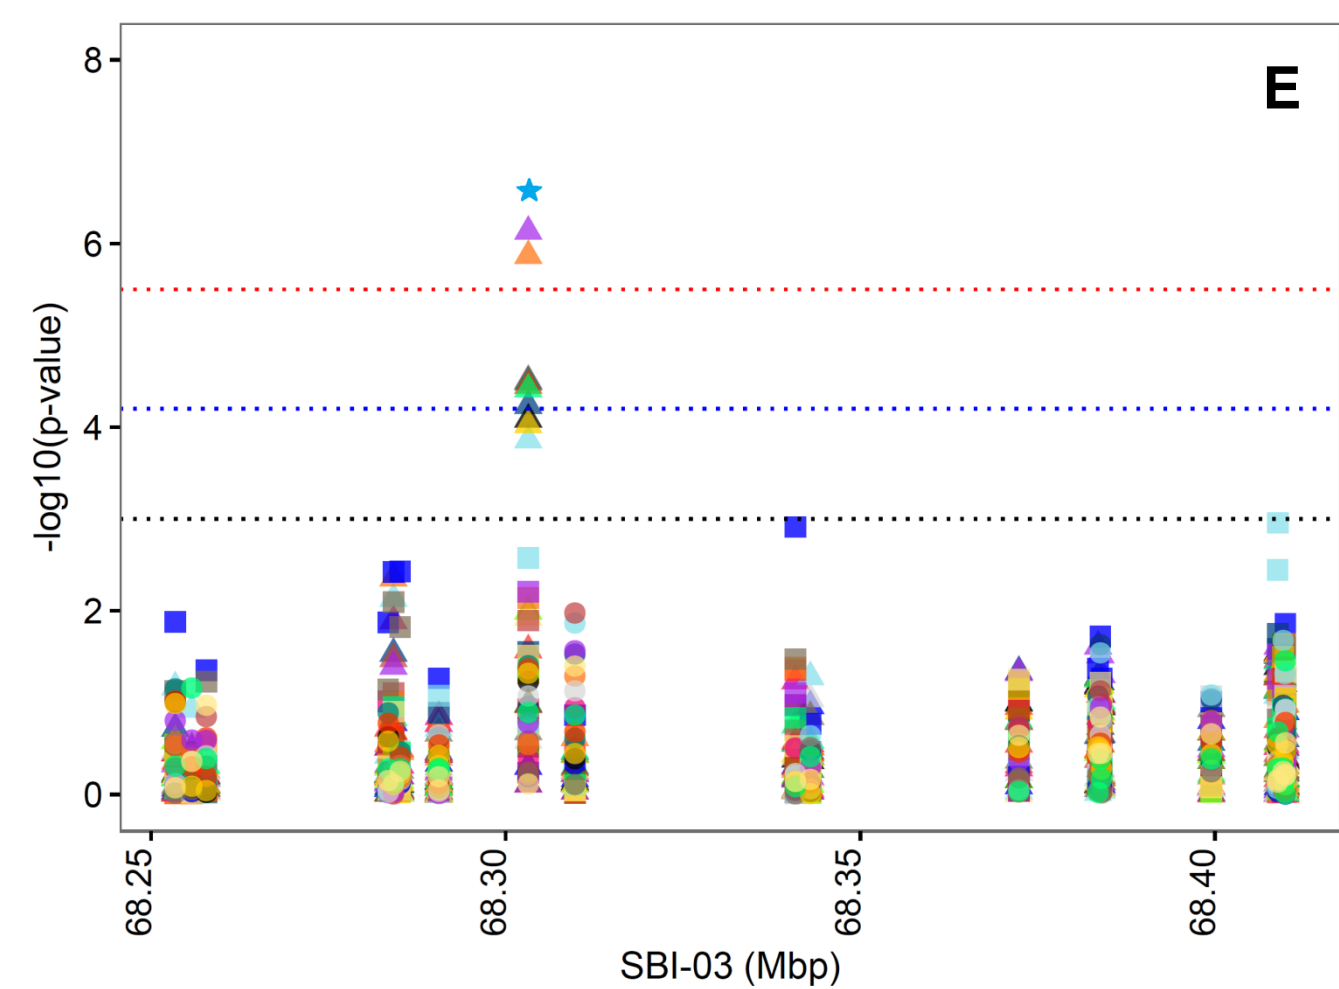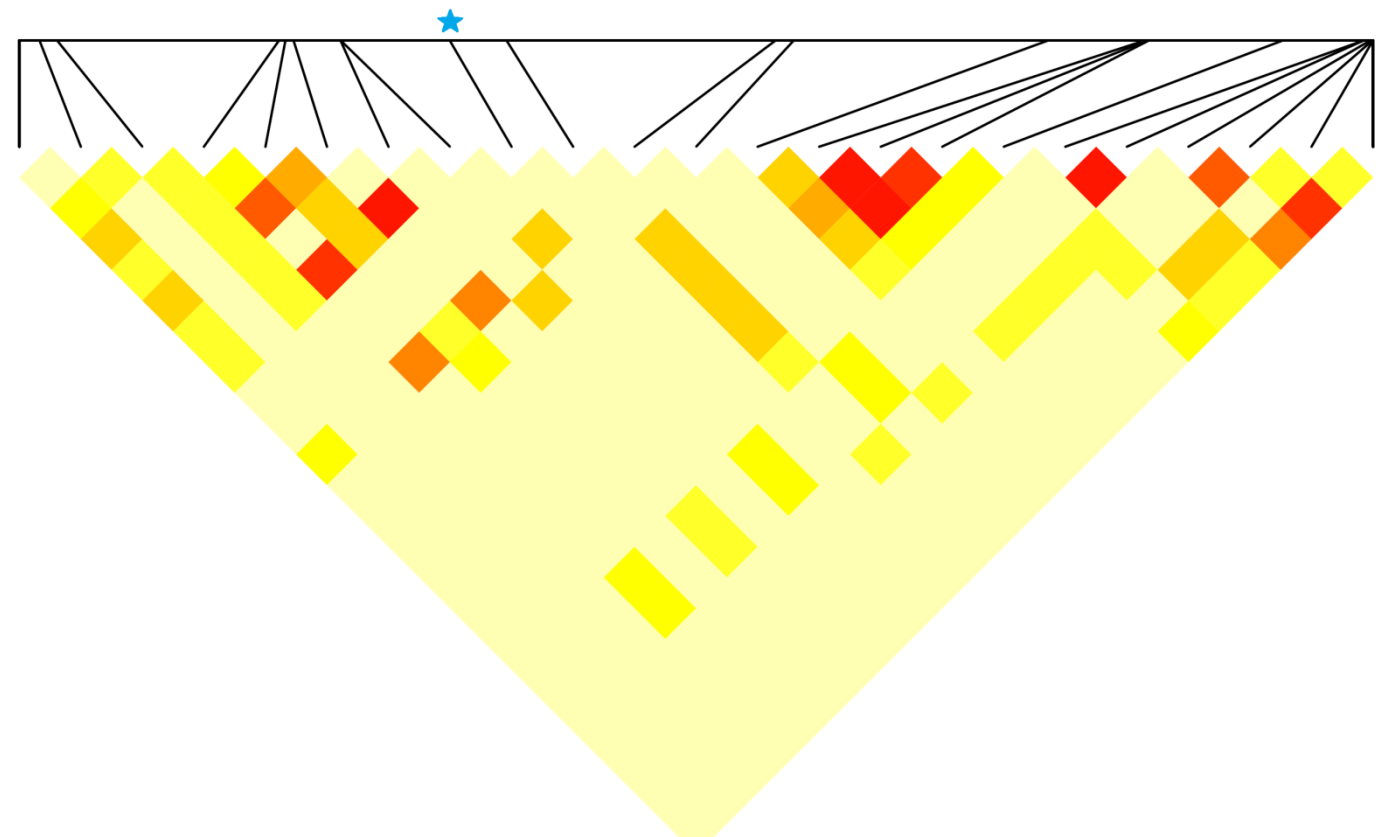

Physical Length:146.3kb

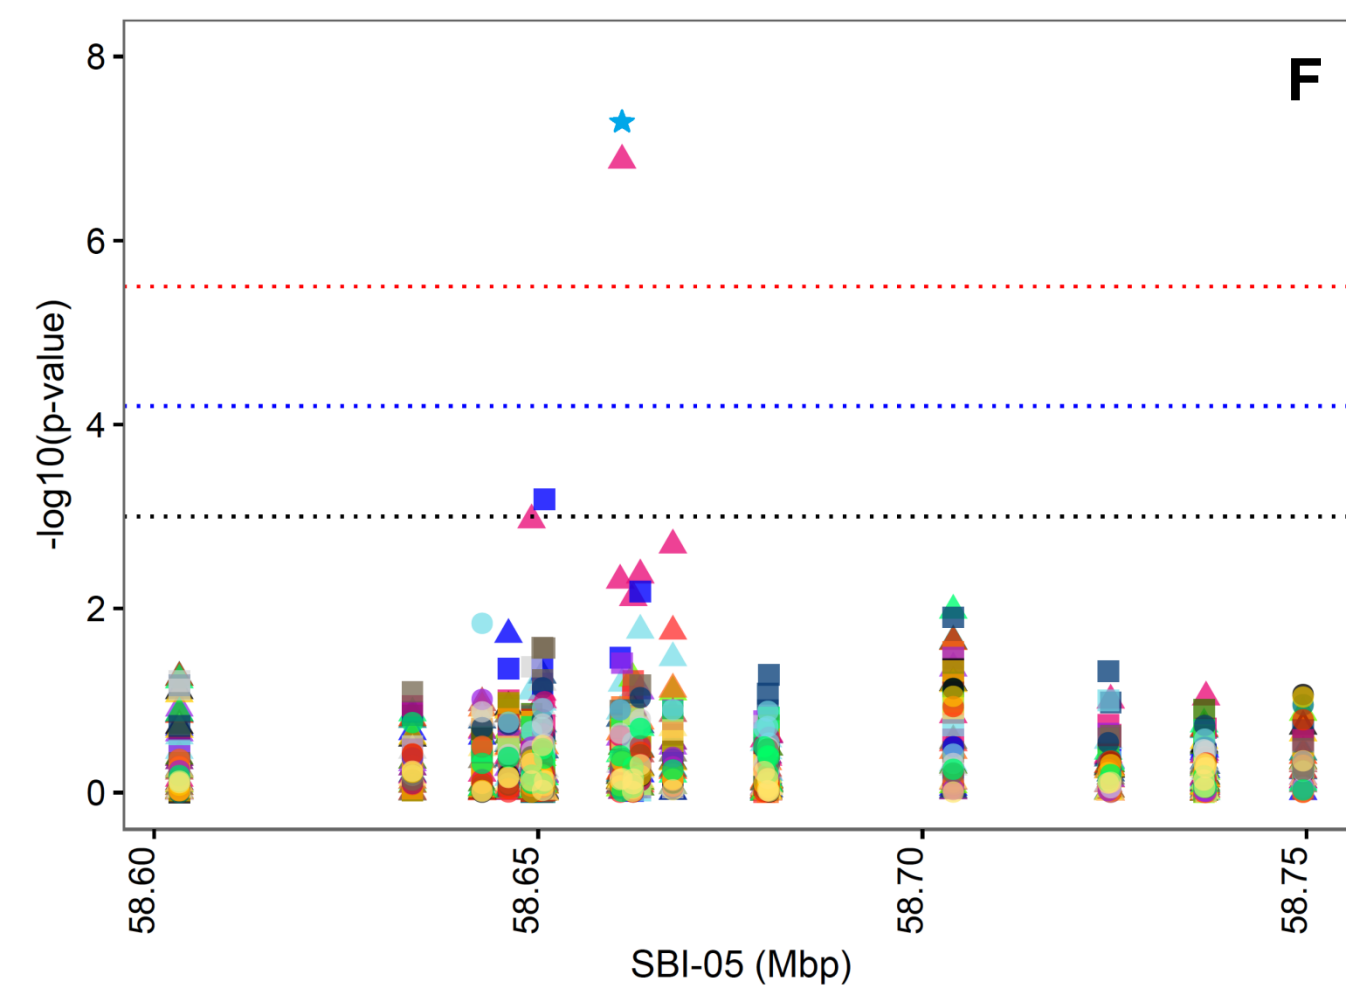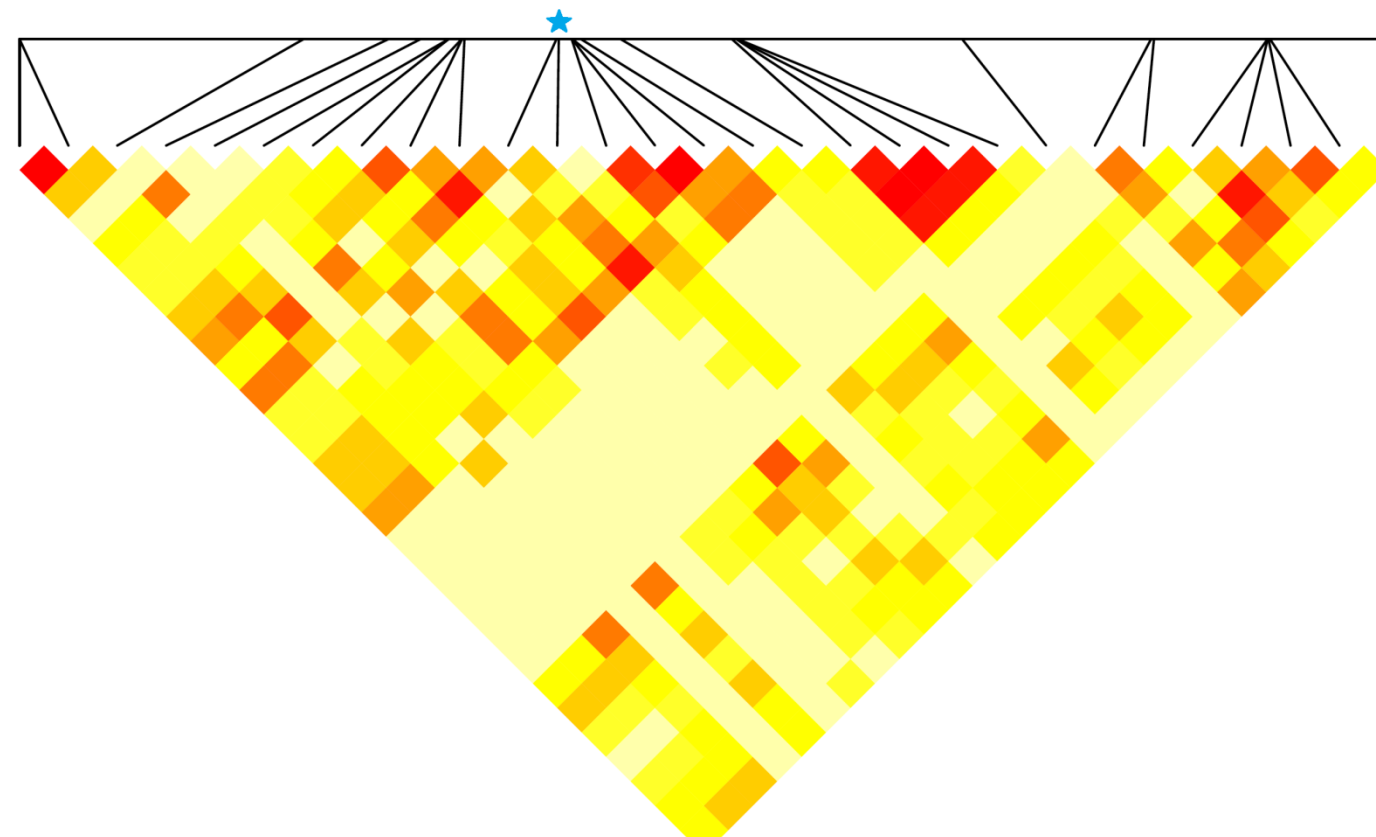

Physical Length:105.1kb

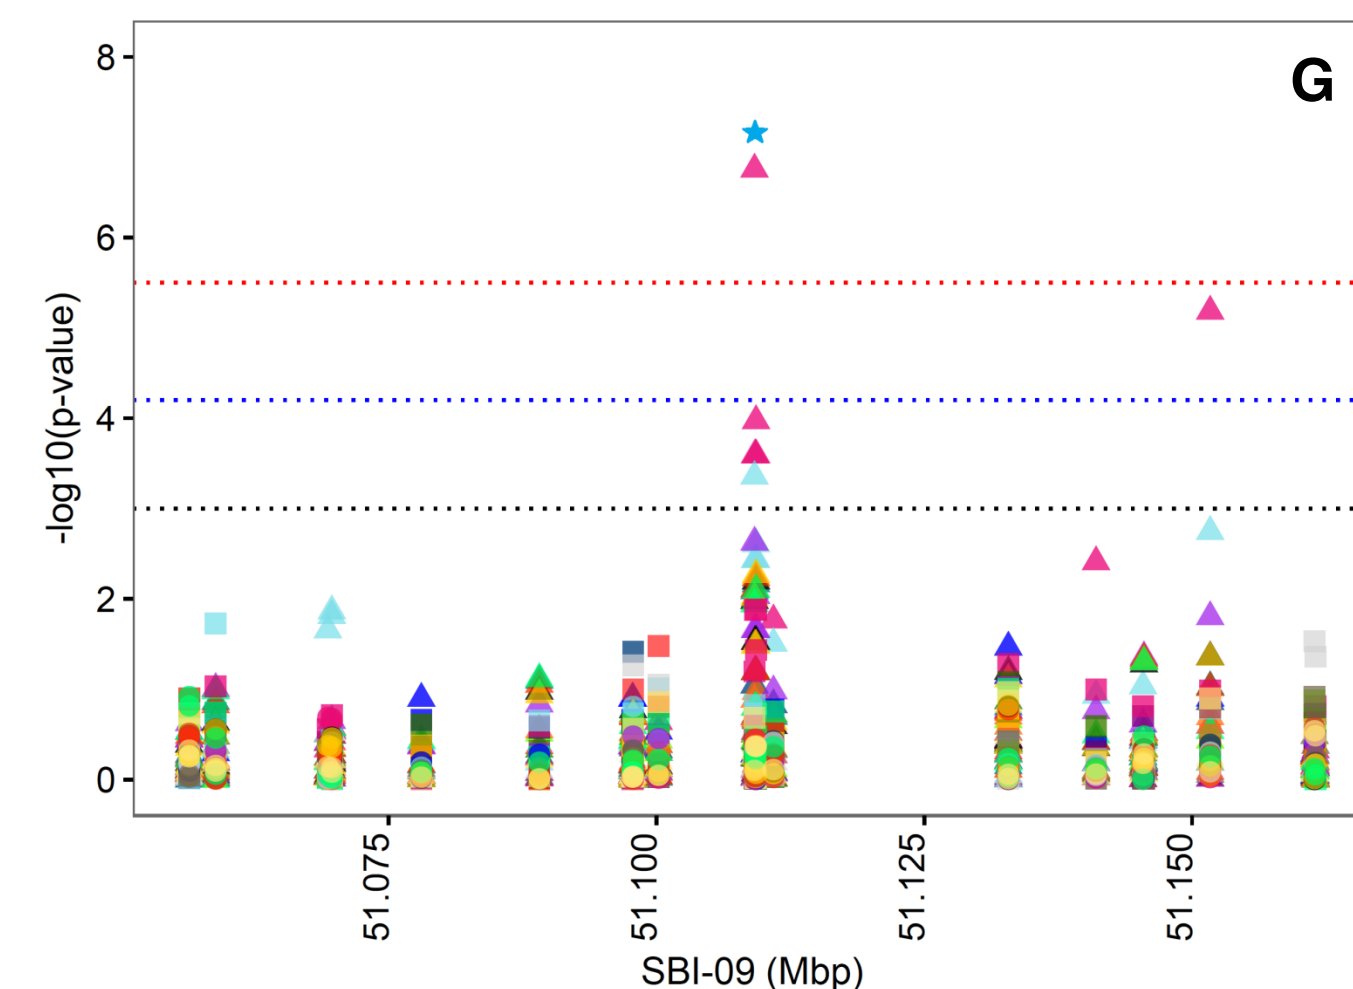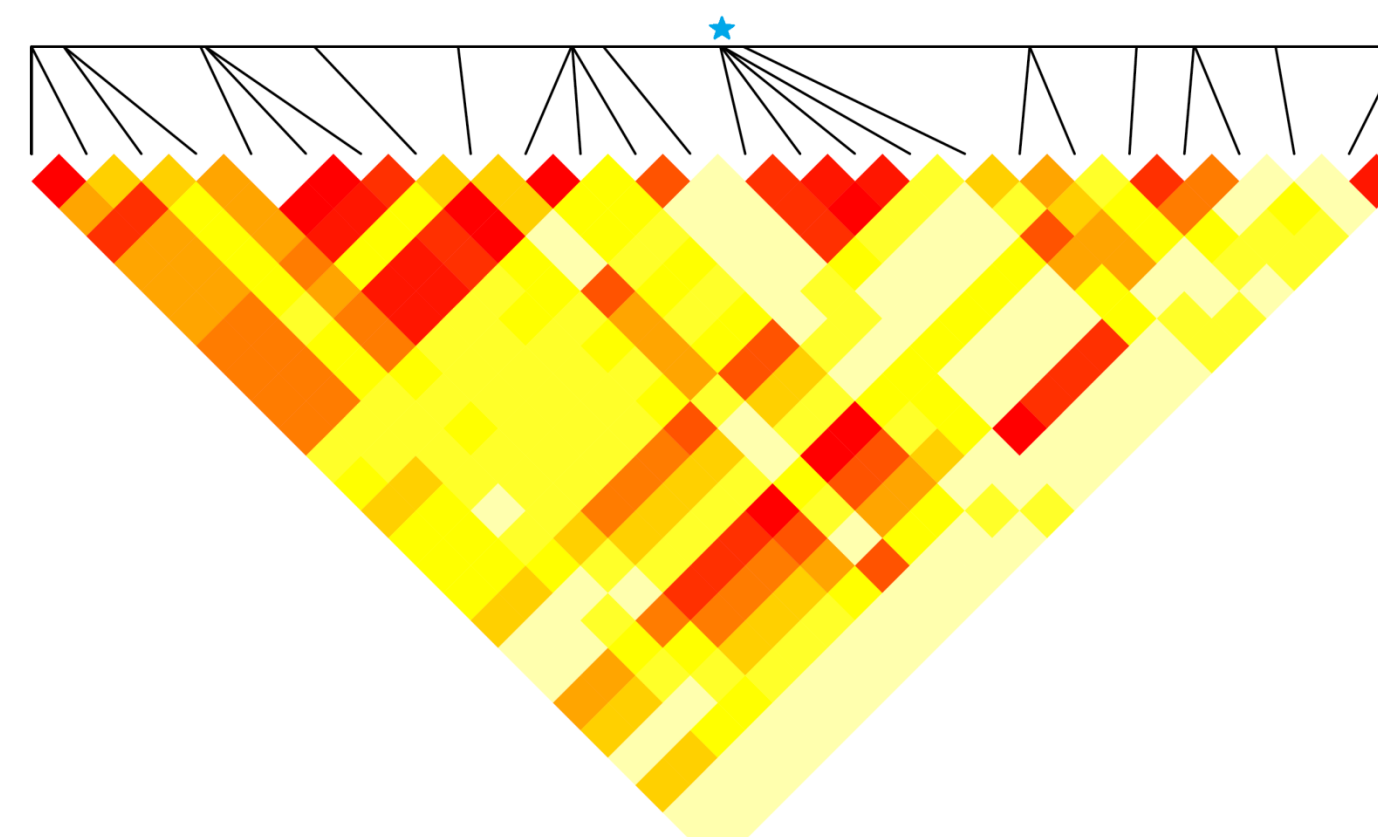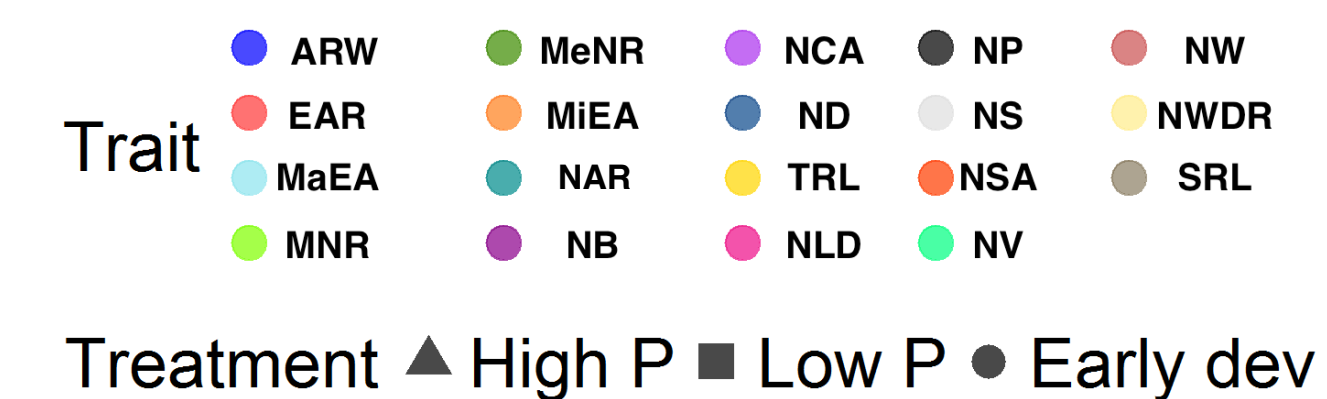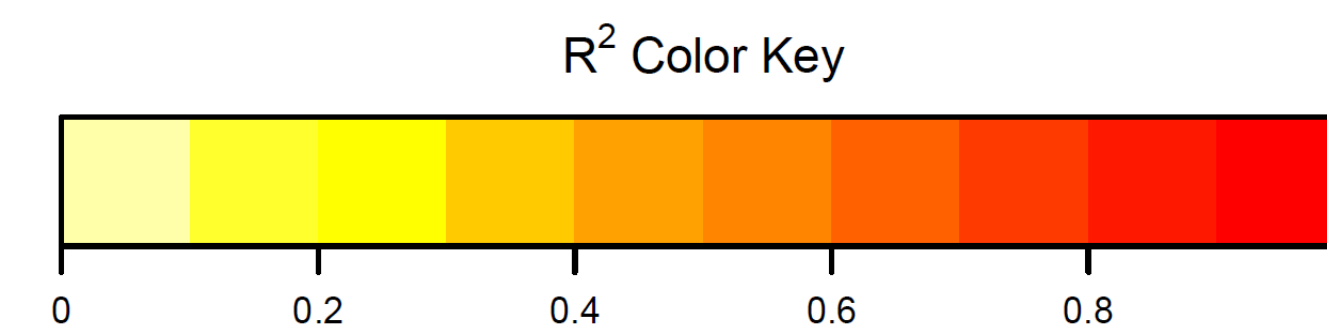

Supplement: mcx157_suppl_figure-4.pdf [file mcx157_suppl_figure-4.pdf]
